1 **Inhibitory KIR ligands are associated with higher *P. falciparum* parasite prevalence**

2 Jean C. Digitale\*<sup>1,2</sup>, Perri C. Callaway\*<sup>1,3</sup>, Maureen Martin<sup>4</sup>, George Nelson<sup>5</sup>, Mathias Viard<sup>4</sup>,  
3 John Rek<sup>6</sup>, Emmanuel Arinaitwe<sup>6,7</sup>, Grant Dorsey<sup>1</sup>, Moses Kamya<sup>6,8</sup>, Mary Carrington<sup>4,9</sup>, Isabel  
4 Rodriguez-Barraquer<sup>†1</sup>, Margaret E. Feeney<sup>†1,10</sup>

5 \*,†These authors contributed equally

6 <sup>1</sup>Department of Medicine, University of California San Francisco, San Francisco, CA, USA

7 <sup>2</sup>Department of Epidemiology and Biostatistics, University of California San Francisco, San  
8 Francisco, CA, USA

9 <sup>3</sup>Infectious Disease and Immunity Graduate Group, University of California Berkeley, Berkeley,  
10 CA, USA

11 <sup>4</sup>Basic Science Program, Frederick National Laboratory for Cancer Research, Frederick, MD,  
12 USA

13 <sup>5</sup>Advanced Biomedical Computational Science, Frederick National Laboratory for Cancer  
14 Research, Frederick, MD,

15 <sup>6</sup>Infectious Diseases Research Collaboration, Kampala, Uganda

16 <sup>7</sup>London School of Hygiene and Tropical Medicine, London, United Kingdom

17 <sup>8</sup>Department of Medicine, Makerere University, Kampala, Uganda

18 <sup>9</sup>Ragon Institute of MGH MIT and Harvard, Cambridge, MA, USA

19 <sup>10</sup>Department of Pediatrics, University of California San Francisco, San Francisco, CA, USA

20 Correspondence: Margaret Feeney, 1001 Potrero Avenue, Building 3, Room 545a, San Francisco  
21 CA 94110, phone: (628) 206-8218, email: [Margaret.feeney@ucsf.edu](mailto:Margaret.feeney@ucsf.edu)

22 The authors have declared that no conflict of interest exists.

23

24 **Abstract**

25 Killer cell immunoglobulin-like receptors (KIR) and their HLA ligands influence the outcome of  
26 many infectious diseases. We analyzed the relationship of compound KIR-HLA genotypes with  
27 risk of *Plasmodium falciparum* infection in a longitudinal cohort of 890 Ugandan individuals.  
28 We found that presence of HLA-C2 and HLA-Bw4, ligands for inhibitory KIR2DL1 and  
29 KIR3DL1, respectively, increased the likelihood of *P. falciparum* parasitemia in an additive  
30 manner. Individuals homozygous for HLA-C2, which mediates strong inhibition via KIR2DL1,  
31 had the highest odds of parasitemia, HLA-C1/C2 heterozygotes had intermediate odds, and  
32 individuals homozygous for HLA-C1, which mediates weaker inhibition through KIR2DL2/3,  
33 had the lowest odds of parasitemia. Additionally, higher surface expression of HLA-C, the ligand  
34 for inhibitory KIR2DL1/2/3, was associated with a higher likelihood of parasitemia. Together  
35 these data indicate that stronger KIR-mediated inhibition confers a higher risk of *P. falciparum*  
36 parasitemia and suggest that KIR-expressing effector cells play a role in mediating anti-parasite  
37 immunity.

38

## 39 **Introduction**

40 *Plasmodium falciparum* malaria has caused hundreds of millions of deaths throughout history  
41 and continues to kill nearly half of a million people each year (World Health Organization,  
42 2018). As a result, *P. falciparum* has exerted strong selective pressure on human evolution  
43 (Kariuki and Williams, 2020; Kwiatkowski, 2005). Most of the human genetic mutations that are  
44 known to alter malaria susceptibility lead to erythrocyte defects or cytoadhesion variants  
45 (Kariuki and Williams, 2020; Kwiatkowski, 2005). However, a recent GWAS analysis of 17,000  
46 individuals estimated that known variants account for only 11% of the total host genetic  
47 influence on malaria susceptibility (Band et al., 2019). Surprisingly, only a few gene variants  
48 implicated in the host immune response have been robustly associated with malaria  
49 susceptibility. Such associations could be particularly valuable in illuminating causal  
50 mechanisms of immune protection. Notably, most studies of host genetic susceptibility to  
51 malaria, including the GWAS study noted above, have compared severe malaria cases to controls  
52 with non-severe (but symptomatic) malaria (Hirayasu et al., 2012; Lourembam et al., 2011). This  
53 analytic framework could overlook genes that influence protection at the earlier pre-erythrocytic  
54 stages of the *P. falciparum* life cycle, before blood stage infection is established.

55

56 Human killer cell immunoglobulin-like receptors (KIR) are a family of diverse inhibitory and  
57 activating transmembrane receptors whose known ligands are primarily HLA class I molecules.  
58 The KIR locus is the second most polymorphic region in the human genome after HLA, and is  
59 evolving even more rapidly, likely in part due to selective pressure from pathogens (Kulkarni et  
60 al., 2008). Human haplotypes vary both in the number of KIR genes and in the proportion that  
61 are inhibitory or activating. While some KIR genes are universal, others are expressed by only a

62 subset of individuals (Middleton and Gonzelez, 2010). Moreover, within an individual, only a  
63 fraction of cells express a given KIR molecule (Andersson et al., 2009). KIR are expressed on  
64 natural killer (NK) cells, some gamma delta T cells, and some CD8 T cells, all of which play a  
65 role in the antimalarial immune response (Burrack et al., 2019; Dantzler and Jagannathan, 2018;  
66 Lefebvre and Harty, 2019). Interactions of KIR with their HLA ligands modulate the activation  
67 threshold of the cell and have been shown to influence the outcome of several, predominantly  
68 viral, infections (Bona et al., 2017; Khakoo et al., 2004; Mori et al., 2019). Because the KIR and  
69 HLA loci are on different chromosomes and segregate independently, associations of the KIR-  
70 HLA compound genotype with susceptibility to a particular pathogen can shed light on  
71 mechanisms critical for immunity and immunopathogenesis.

72

73 To date, the association of KIR and their HLA ligands with susceptibility to malaria has been  
74 examined in very few studies and almost entirely in the context of case-control comparisons of  
75 severe vs. non-severe malaria (Hirayasu et al., 2012; Lourembam et al., 2011). Here, we  
76 examined the influence of well-defined KIR-HLA ligand pairs on the prevalence of *P.*  
77 *falciparum* parasitemia and malaria in a longitudinal cohort of 890 individuals from three sites  
78 with varying malaria transmission in Uganda to determine the influence of KIR on susceptibility  
79 to *P. falciparum* infection. This analysis revealed that individuals with more inhibitory KIR-  
80 HLA pairs have higher odds of parasitemia, strongly supporting a role for cellular immunity in  
81 host restriction of the parasite.

## 82 **Results**

### 83 *Clinical cohort and KIR-HLA genotyping*

84 We analyzed data from 657 children and 233 adults recruited from 292 households at three study  
85 sites in Uganda (Table 1). Genotyping of KIR and HLA class I loci was performed (Table 2),  
86 and individuals were categorized based on the presence of well-characterized KIR ligand groups  
87 (i.e. HLA-C2 for KIR2DL1, HLA-C1 for KIR2DL2/3, and HLA-Bw4 for KIR3DL1,  
88 Supplemental Table 1). The prevalence of the inhibitory KIR genes KIR2DL1 and KIR3DL1  
89 was very high (both >98.5%), consistent with previous reports in East African populations  
90 (Nakimuli et al., 2013). In order to control for KIR-HLA differences in ethnicity, participants'  
91 ethnicity was categorized as Bantu or non-Bantu based on the language of their consent form  
92 (Table 1). However, as ethnicity was largely collinear with site, including it in models did not  
93 improve model fit beyond site fixed effects; it was therefore omitted from final analyses.

94

95 Subjects were followed longitudinally from August 2011-June 2016 with blood smears  
96 performed every 3 months to assess *P. falciparum* parasitemia. Reflecting the varying  
97 transmission intensity among the sites, the prevalence of parasitemia was highest among children  
98 in Tororo (64%), followed by Kanungu (36%) and Jinja (13%). The incidence of malaria,  
99 defined as parasitemia accompanied by fever (presented at clinic with temperature >38.0 °C or  
100 self-reported in last 24 hours), also differed among the three sites and was inversely associated  
101 with age (Rodriguez-Barraquer et al., 2018). Both malaria incidence and parasite prevalence by  
102 microscopy were substantially lower among adults than children (Table 1).

103

104 To assess whether KIR and their HLA class I ligands influence the risk of *P. falciparum*

105 infection or its clinical manifestations, we tested associations of individual KIR genes, HLA  
106 ligand groups and KIR-HLA compound genotypes with 5 malaria outcome measures: prevalence  
107 of parasitemia, clinical malaria incidence, parasite density (stratified by routine quarterly visits  
108 and malaria visits), conditional probability of clinical malaria given the presence of parasitemia,  
109 and temperature at parasitemic visits, conditional on parasite density. For each association, we  
110 report the p-value from a multi-level model (p), an empirical p-value after permutation tests (p\*),  
111 and a q-value (q) calculated by applying the false discovery rate correction for multiple  
112 comparisons to the empirical p-values as described in Methods. There was no association  
113 between the presence of any individual KIR gene with any of these outcomes (Supplemental  
114 Tables 2a-f), so we next assessed the presence of KIRs in conjunction with their HLA ligands.

115

#### 116 *Inhibitory KIR2DL1 ligand HLA-C2 increases risk of P. falciparum parasitemia*

117 Among the best characterized KIR-HLA ligand interactions are the inhibitory KIR2DL1 with the  
118 HLA-C2 subgroup of HLA-C alleles and KIR2DL2/L3 with the HLA-C1 subgroup. HLA-C2  
119 alleles possess a lysine at amino acid position 80 whereas HLA-C1 alleles have an asparagine  
120 (Bianconi et al., 1995). Since KIR2DL1 (98.6%) and KIR2DL2/3 (99.3%) were both present in  
121 virtually all subjects, the presence of their HLA ligands determines which inhibitory KIR/HLA-  
122 C pair(s) an individual has. Further, within these inhibitory KIR/HLA-C ligand interactions,  
123 there is a hierarchy of inhibition. KIR2DL1/HLA-C2 provides the strongest inhibition, followed  
124 by KIR2DL2/HLA-C1, while KIR2DL3/HLA-C1 provides the weakest inhibition (Carrington et  
125 al., 2005; Moesta et al., 2008; Winter et al., 1998). We found that individuals with at least one  
126 copy of the KIR2DL1 ligand HLA-C2 had 1.31-fold higher odds of being parasitemic (p=0.017,  
127 p\*=0.010, q=0.047). Conversely, having at least one HLA-C1 allele decreased the odds of being

128 parasitemic (OR=0.79, p=0.016, p\*=0.013, q=0.051).

129

130 Next, we assessed the zygosity of HLA-C ligand groups to determine whether the number of  
131 copies of either HLA-C1 or HLA-C2 influenced parasite prevalence. HLA-C1/C1 individuals are  
132 only able to receive inhibitory signals via KIR2DL2/3, whereas HLA-C2/C2 individuals receive  
133 inhibitory signals predominantly via KIR2DL1, and heterozygous individuals have the ligand for  
134 all three of these KIRs (Biassoni et al., 1995). Comparison of these groups revealed a stepwise  
135 increase in parasite prevalence, with HLA-C2/C2 individuals having 1.54-fold higher odds of  
136 parasitemia compared to HLA-C1/C1 individuals (Table 3). Heterozygous (HLA-C1/C2)  
137 individuals had intermediate odds. These results suggest that engagement of KIR2DL1 with its  
138 ligand HLA-C2, the most inhibitory of the KIR/HLA-C ligand pairs, increases parasite  
139 prevalence in comparison to engagement of KIR2DL2/3 with their ligand HLA-C1, which in  
140 general provide weaker inhibitory signals. KIR2DL1 expressing cells from HLA-C2/C2  
141 homozygous individuals will receive stronger inhibitory signals, potentially dampening the  
142 effector cell response to *P. falciparum* infection.

143

144 KIR2DL2 and KIR2DL3 segregate as alleles of the same locus, but KIR2DL2 provides stronger  
145 effector cell inhibition when bound to HLA-C1 (Moesta et al., 2008). Overall, no difference in  
146 parasitemia risk was observed between KIR2DL3/C1 and KIR2DL2/C1 individuals (Table 4).  
147 However, KIR2DL2 is in linkage disequilibrium with the homologous activating receptor  
148 KIR2DS2 (Wn\*=0.85, Fisher's exact test p<0.001), which may be capable of binding HLA-C1  
149 ligands in a peptide dependent manner (Moesta and Parham, 2012; Naiyer et al., 2017). To test  
150 whether KIR2DS2 may have an opposing effect that could obscure the stronger inhibitory impact

151 of KIR2DL2, we examined the impact of KIR2DL2 and KIR2DL3 among individuals lacking  
152 the KIR2DS2 gene. This revealed that presence of at least one copy of KIR2DL2 increased the  
153 odds of being parasitemic 1.6-fold compared to those with only KIR2DL3 (Table 4). While  
154 KIR2DL3/HLA-C1, the least inhibitory KIR-HLA combination in the hierarchy, was associated  
155 with a lower prevalence of *P. falciparum* parasitemia, previous data indicate that it markedly  
156 increases the risk of cerebral malaria, an inflammatory complication of malaria (Hirayasu et al.,  
157 2012). Together these data further support a hierarchy of inhibition, in which KIR-HLA  
158 combinations with stronger inhibitory potential increase parasite prevalence.

159

#### 160 *Inhibitory KIR3DL1 ligand HLA-Bw4 increases risk of P. falciparum parasitemia*

161 Another inhibitory KIR molecule, KIR3DL1, recognizes a subset of HLA-A and HLA-B alleles  
162 that contain the HLA-Bw4 motif, defined by amino acid residues 77-83 on the alpha1-helix  
163 (Gumperz et al., 1995). Similar to KIR2DL1, the KIR3DL1 gene was nearly universal in our  
164 Ugandan cohort (98.7%), hence its effect on parasite prevalence could not be estimated directly.  
165 However, only 74.8% of individuals had an HLA-Bw4 ligand, enabling us to estimate the effect  
166 of the KIR-HLA ligand pair. Among individuals with the HLA-Bw4 ligand, the odds of  
167 parasitemia were 1.31-fold higher than in individuals lacking HLA-Bw4 ( $p=0.012$ ,  $p^*=0.006$ ,  
168  $q=0.040$ ). This further supports the hypothesis that greater inhibition via KIR increases the  
169 likelihood of parasitemia, perhaps due to dampened cellular immunity.

170

171 Because both HLA-C2 and HLA-Bw4 were found to increase parasite prevalence and they have  
172 previously been shown to be in linkage disequilibrium, we looked for an additive effect of the  
173 two ligand groups by analyzing the combined genotype. Having both HLA-C2 and HLA-Bw4



174 increased the odds of being parasitemic by 1.46 times compared to HLA-C2 alone ( $p=0.001$ ,  
175  $p^*<0.001$ ,  $q=0.008$ ) and by 1.51 times compared to HLA-Bw4 alone ( $p=0.002$ ,  $p^*=0.001$ ,  
176  $q=0.012$ ), suggesting an additive inhibitory effect of the two KIR-HLA ligand pairs. Together,  
177 this supports a model wherein the more inhibitory signals that KIR expressing effector cells can  
178 receive, the greater the risk of parasitemia.

179

180 *Higher surface expression of inhibitory KIR ligand HLA-C is associated with increased odds of*  
181 *parasitemia*

182 To further elucidate the means by which HLA-C influences *P. falciparum* infection, we  
183 examined the relationship of HLA-C surface expression levels to *P. falciparum* parasite  
184 prevalence. HLA-C molecules have been ascribed two distinct roles in cellular immunity – as  
185 ligands for inhibitory KIR, and as antigen presenting molecules for CD8 T cells – both of which  
186 can influence infectious disease outcomes (Bona et al., 2017; Khakoo et al., 2004; Marco et al.,  
187 2017). In contrast to HLA-A and -B molecules, surface expression of HLA-C is 10-15 fold lower  
188 and varies substantially amongst individual allotypes (Apps et al., 2015). During viral infections  
189 such as HIV infection, HLA-C alleles that are more highly expressed at the cell surface have  
190 been associated with a more potent CD8 T cell response that correlates with enhanced viral  
191 control (Corrah et al., 2011; Thomas et al., 2009). We hypothesized that if the protection  
192 associated with certain HLA-C ligand groups is attributable to differences in peptide  
193 presentation, then higher HLA-C expression would similarly correlate with a reduced likelihood  
194 of parasitemia. We assigned each HLA-C allele a value based on its previously determined  
195 expression levels (Apps et al., 2013), and calculated a total HLA-C expression level for each  
196 individual. We found that higher HLA-C expression was associated with a statistically

197 significant *increase* in the odds of *P. falciparum* parasitemia (1.12-fold increase per one standard  
198 deviation of expression;  $p=0.014$ ,  $p^*=0.006$ ,  $q=0.040$ ). This contrasts with HIV infection, where  
199 highly expressed HLA-C allotypes are protective against HIV. These data suggest that the  
200 mechanism by which HLA-C molecules influence restriction of *P. falciparum* parasitemia is not  
201 antigen presentation to T cells, but is more consistent with a role in KIR-mediated inhibition of  
202 effector cells.

203

#### 204 *Relationship of KIR-HLA genotype to other parasitological and clinical malaria outcomes*

205 Finally, because the immune mechanisms responsible for restricting parasitemia may differ from  
206 those that protect against symptomatic malaria, we also examined the association of KIR-HLA  
207 ligand pairs with the other parasitological and clinical outcomes noted above (Supplemental  
208 Table 2b-f). We did not observe an association of KIR-HLA ligand pairings with any of these  
209 outcomes. Together these results are most consistent with an influence of KIR-expressing  
210 effector cells on restriction of parasite replication, rather than on the downstream inflammatory  
211 consequences that eventuate in fever and other clinical symptoms.

212

213 In addition, we performed multiple sensitivity analyses to assess the robustness of our results. A  
214 more sensitive measure of parasitemia (loop-mediated isothermal amplification—LAMP) was  
215 performed on samples that were negative by microscopy at routine visits. However, these data  
216 were not included in the primary analyses because LAMP was not conducted consistently on  
217 samples from adults at the three sites throughout the study duration. When the definition of  
218 parasitemia was expanded to also include the submicroscopic *P. falciparum* infections detectable  
219 by LAMP among children for the entire follow-up period (Supplemental Table 3) and among

220 children and adults for the period LAMP data were available for both (Supplemental Table 4),  
221 similar associations for all results stated above were observed. In addition, we analyzed models:  
222 1) stratified by site (Supplemental Table 5a-c) to determine whether our results were robust  
223 across transmission intensities and ethnicities, 2) restricted to children as they suffer the largest  
224 burden of parasitemia (Supplemental Table 6), and 3) excluding individuals with hemoglobin S  
225 (sickle cell) mutations to ensure our results were not confounded by sickle cell variants  
226 (Supplemental Table 7). These secondary analyses yielded similar results, further strengthening  
227 our findings.

228

229

## 230 **Discussion**

231 Using longitudinal data from Ugandan individuals with varying malaria exposure, we found that  
232 the major inhibitory KIR ligands HLA-C2 and HLA-Bw4 were both associated with a higher  
233 prevalence of *P. falciparum* parasitemia. Our data indicate that both the number of inhibitory  
234 KIR-HLA ligand pairs and the strength of their cellular inhibitory signaling influence the risk of  
235 *P. falciparum* parasitemia, but notably, do not impact clinical malaria. Our findings suggest that  
236 the cellular immune response plays a critical role either in the prevention or clearance of blood-  
237 stage *P. falciparum* infection. These associations represent a novel genetic determinant of *P.*  
238 *falciparum* parasitemia, and support an expanded role for KIR in modulating host immunity to  
239 parasitic infections.

240

241 This novel association of KIR-HLA compound genotypes with the prevalence of parasitemia is  
242 somewhat paradoxical given that *P. falciparum* spends most of its life cycle outside of HLA-  
243 expressing cells. Following intradermal inoculation by mosquitoes, *P. falciparum* sporozoites  
244 migrate via the dermis and lymphatics to infect hepatocytes, the only stage in the parasite  
245 replicative life cycle in which it is within an HLA-expressing host cell (Mota et al., 2001).  
246 Within the hepatocyte, parasites expand 2,000-40,000 fold, then emerge synchronously as  
247 merozoites, which establish a self-propagating cycle of erythrocytic infection (Crutcher and  
248 Hoffman, 1996; Sturm et al., 2006). Because erythrocyte membranes contain little to no HLA  
249 (Moras et al., 2017), we hypothesize that the influence of KIR on cell-mediated anti-parasite  
250 immunity may occur primarily during the liver stage when the multiplicity of infection is also  
251 lowest. It has previously been shown that increasing KIR mediated NK cell inhibition is  
252 associated with poorer clearance of HCV and HBV in the liver (Bona et al., 2017; Khakoo et al.,

253 2004). However, it is also possible that the observed impacts of KIR-HLA pairs on parasite  
254 prevalence may be due to enhanced spontaneous clearance of parasitemia rather than cessation of  
255 infection at the liver stage. During the blood stage, KIR-expressing effector cells may respond  
256 more strongly to an HLA-devoid cell due to the loss of tonic inhibitory signaling via inhibitory  
257 KIR (Kim et al., 2008). KIR inhibition may also influence the clearance of parasites through  
258 antibody dependent cellular cytotoxicity (ADCC) (Lisovsky et al., 2019; Parsons et al., 2010).

259

260 It is notable that we did not observe an influence of KIR or their HLA ligands on symptomatic  
261 malaria. In endemic regions, “clinical immunity”—defined as protection from symptomatic  
262 malaria—develops gradually with increasing age and exposure to the *P. falciparum* parasite, but  
263 sterilizing immunity (i.e. protection against parasitemia) does not (Tran et al., 2013). Hence, it is  
264 likely that the immune mechanisms underlying sterile protection and restriction of parasite  
265 replication differ from those that mediate clinical immunity, with the latter involving  
266 immunoregulatory processes that dampen the inflammation responsible for fever and other  
267 symptoms, while fostering successful long-term parasitism. By definition, sterile immunity is  
268 directed at the pre-erythrocytic (sporozoite and liver) stages of parasite development. The pre-  
269 erythrocytic immune response can prevent or greatly limit the establishment of blood-stage  
270 parasitemia and is believed to be mediated by CD8 T cells (Hafalla et al., 2006; Lefebvre and  
271 Harty, 2019), NK cells (Arora et al., 2018; Hart et al., 2019, 2017) and the semi-innate V $\gamma$ 9V $\delta$ 2  
272 subset of  $\gamma\delta$  T cells (Farrington et al., 2016; Jagannathan et al., 2014; Mamedov et al., 2018;  
273 Zaidi et al., 2017), all of which can express KIR. It remains possible that KIR-HLA interactions  
274 exert an impact on the symptomatic or inflammatory manifestations of malaria that we were  
275 underpowered to detect, given that all members of this study cohort had access to free clinical

276 care which afforded prompt diagnosis and treatment of malaria. Indeed, Hirayasu et. al. reported  
277 that the risk of cerebral malaria, an inflammatory complication, is markedly elevated among  
278 individuals with KIR2DL3/HLA-C1, which is the least inhibitory pairing amongst KIR2DL1/2/3  
279 ligands (Hirayasu et al., 2012). Immunopathology contributes substantially to the neurological  
280 damage caused by cerebral malaria (Grau et al., 1989) and NK cells have been found to  
281 accumulate in the brain microvasculature (Hansen et al., 2007). Thus, lower KIR inhibition could  
282 allow unrestrained NK cell activation resulting in immune-mediated pathology in the brain. This  
283 would be consistent with the hypothesis that mechanisms that prevent initial *P. falciparum*  
284 infection and those that prevent severe disease are distinct and may have a balancing effect on  
285 the maintenance of different KIR and HLA ligands in malaria endemic populations.

286

287 The results of our study also underscore that case-control studies of severe vs. non-severe  
288 malaria have important limitations as a framework to identify immune susceptibility genes.  
289 Because such comparisons are restricted to individuals in whom parasitemia is already  
290 established, they cannot identify genetic factors influencing host restriction at the pre-  
291 erythrocytic stages of infection. Moreover, the development of severe malaria is likely to be  
292 influenced by genetic factors governing inflammation, as well as non-genetic factors such as  
293 socio-economic status and access to care. We believe that additional genetic determinants of  
294 malaria may be uncovered through analytic methods that incorporate rigorous longitudinal  
295 assessments of both parasite infection and symptoms, enabling evaluation of immune protection  
296 at varying stages of malaria: from initial infection and establishment of parasitemia, to  
297 development of symptomatic or even severe malaria.

298

299 While it is well established that KIRs influence the immune response to and ultimate outcome of  
300 numerous viral infections, their impact on the control of non-viral infections has been less  
301 certain. Our finding that inhibitory KIR ligands increase the risk of *P. falciparum* parasitemia  
302 indicates that the influence of KIR on host immunity extends to parasitic infections. Moreover,  
303 our findings suggest an important role for the cellular immune response in restricting *P.*  
304 *falciparum* infection, perhaps during the earliest stages of infection, before blood-stage  
305 parasitemia is established. These findings represent a novel genetic determinant of malaria  
306 susceptibility and further our understanding of antimalarial immunity with implications for  
307 vaccine design.  
308

309

## 310 **Methods**

### 311 *Study Approval*

312 This study was granted ethical approval from the Makerere University School of Medicine  
313 Research and Ethics Committee, the London School of Hygiene and Tropical Medicine Ethics  
314 Committee, the University of California, San Francisco, Committee on Human Research and the  
315 Uganda National Council for Science and Technology. All participants and/or their  
316 parents/guardians gave written informed consent for their household upon enrollment.

### 317 *Clinical and parasitological outcomes*

318 Data were collected from Ugandan subjects enrolled into three parallel longitudinal cohorts  
319 conducted as part of the East Africa International Center of Excellence for Malaria Research, at  
320 sites with a range of malaria transmission intensity. Nagongera, in Tororo district, is a high-  
321 transmission, rural area in southeastern Uganda. Kihhihi, in Kanungu district, is a rural area in  
322 southwestern Uganda with moderate transmission. Walukuba, in Jinja district, is a relatively low-  
323 transmission, peri-urban area near Lake Victoria. Households in the three sites were enumerated  
324 and approximately 100 households per site were randomly selected. All children aged 6 months  
325 to 10 years and one adult caregiver per household who met eligibility criteria (usually a female)  
326 were invited to participate between August and October 2011. Children aged out of the cohort  
327 when they reached 11 years of age. Participants were followed through June 2016; visits after  
328 December 31, 2014 from Tororo were excluded from this analysis because transmission changed  
329 dramatically at this site after intensive indoor residual spraying campaigns were started. Analytic  
330 follow-up time was a median of 55 months in Jinja, 57 months in Kanungu, and 39 months in  
331 Tororo. Further detail on the cohort is available from Kamya et al. (Kamya et al., 2015).

332



333 Clinical data were obtained via both active and passive follow-up. All participants visited the  
334 clinic quarterly to obtain thick blood smears. In addition, caregivers were asked to bring their  
335 children to study clinics to receive care for any illness free of charge. Thick blood smears were  
336 performed on all children who reported fever in the previous 24 hours or who were febrile  
337 ( $>38.0^{\circ}\text{C}$ ) at the sick visit. Parasitemia was determined based on microscopy and parasite density  
338 was calculated as previously described (Rodriguez-Barraquer et al., 2018). A more sensitive  
339 measure of parasitemia (loop-mediated isothermal amplification—LAMP) was performed on  
340 samples negative by microscopy at routine visits throughout follow-up for children. However,  
341 LAMP was not conducted consistently on samples from adults at all sites throughout the study  
342 duration and thus was not included in primary analyses. Those with symptomatic malaria were  
343 treated with the first line treatment in Uganda, artemether-lumefantrine. Those with complicated  
344 or recurrent malaria (occurring within 14 days of last therapy) were treated with quinine  
345 (Rodriguez-Barraquer et al., 2018).

346  
347 Entomologic data were collected monthly at all study households. Mosquitoes were collected  
348 using miniature CDC light traps and tested for sporozoites using an ELISA technique, as  
349 previously described (Kilama et al., 2014). For each household an annual entomological  
350 inoculation rate (EIR) was calculated as the product of the of the yearly household human biting  
351 rate (geometric mean of female *Anopheles* mosquitoes caught in a household per day) and the  
352 site sporozoite rate (average proportion of mosquitos that tested positive for *P. falciparum* in  
353 each site), as previously reported (Rodriguez-Barraquer et al., 2018).

354  
355 *HLA and KIR Genotyping*

356 HLA genotyping was performed using a targeted next generation sequencing (NGS) method.  
357 Briefly, locus-specific primers were used to amplify a total of 23 polymorphic exons of HLA-A,  
358 B, C (exons 1 to 4), DPA1 (exon 2), DPB1 (exons 2, 3), DQA1 (exon 2), DQB1 (exons 2, 3),  
359 DRB1 (exons 2, 3), and DRB3, 4, 5 (exon 2) genes with Fluidigm Access Array (Fluidigm  
360 Singapore PTE Ltd, Singapore). The 23 Fluidigm PCR amplicons were pooled and subjected to  
361 sequencing on an illumina MiSeq sequencer (Illumina, San Diego, CA). HLA alleles and  
362 genotypes were called using the Omixon HLA Explore (beta version) software (Omixon,  
363 Budapest, Hungary).

364  
365 KIR genotyping for the presence or absence of each KIR gene was conducted by PCR with  
366 sequence-specific priming (PCR-SSP) as described previously (Martin and Carrington, 2008),  
367 with some modifications. Each PCR was conducted in a volume of 5 ul using 5 ng genomic  
368 DNA and SYBR Green PCR Master Mix with Platinum Taq (Invitrogen). Presence and absence  
369 of specific PCR products was detected by melting curve analysis on the 7900 Real-Time PCR  
370 System (Applied Biosystems).

371  
372 *HLA-C Expression Levels*

373 HLA-C expression levels were imputed using estimates based on previously published  
374 quantitative measurements of HLA-C allotypes (Apps et al., 2013).

375  
376 *Statistics*

377 We analyzed the association of KIR and their HLA ligands with five different outcomes related  
378 to malaria immunity:

- 379 1. Parasite prevalence: Prevalence of at least one symptomatic or asymptomatic parasite  
380 positive visit per quarter (by microscopy).
- 381 2. Annual malaria incidence rate: Number of symptomatic malaria episodes per person-  
382 year. Symptomatic malaria was defined as children with a tympanic temperature  $>38^{\circ}\text{C}$   
383 at time of presentation to clinic plus parasitemia or those with a self-reported history of  
384 fever in past 24 hours plus parasitemia.
- 385 3. Parasite density: Log parasite density measured during visit (in analyses, stratified by two  
386 visit types: routine quarterly parasite-positive visits and symptomatic malaria visits).
- 387 4. Probability of symptoms if infected: Whether a participant was febrile if they were  
388 parasitemic. (Episodes of asymptomatic parasitemia where fever developed within 7 days  
389 and repeat episodes of febrile parasitemia within 7 days of initial episode were excluded  
390 so that each malarial episode was only counted once.)
- 391 5. Temperature at parasitemic visits: Objective temperature at parasitemic visits, conditional  
392 on parasite density.

393

394 First, we assessed the effect of each KIR individually on these outcomes. Next, we explored  
395 KIR-HLA compound genotypes as follows. HLA ligand group definitions are in Supplemental  
396 Table 1. KIR2DL1, which binds HLA-C2, was present in nearly all subjects (98.6%). KIR2DL2  
397 and KIR2DL3 segregate as alleles of the same locus and have the same HLA ligand, HLA-C1;  
398 virtually everyone in this sample has KIR2DL2 and/or KIR2DL3 (99.3%). We examined the  
399 effect of having at least one copy of HLA-C2 among those with KIR2DL1 and of having at least  
400 one copy of HLA-C1 among those with KIR2DL2 and/or KIR2DL3. Building on this, we  
401 investigated HLA-C1/C2 zygosity in the entire sample to determine the effect of multiple copies

402 of each ligand. We then assessed the effect of a joint variable: no HLA-C1 ligand (i.e. HLA-C2  
403 homozygous), HLA-C1 with KIR2DL2 only, HLA-C1 with KIR2DL2 and KIR2DL3, or HLA-  
404 C1 with KIR2DL3 only. We repeated this analysis among those with no KIR2DS2 (for the  
405 outcome of parasite prevalence only). Another inhibitory KIR, KIR3DL1, was also nearly  
406 ubiquitous in the sample (98.7%). We again considered the effect of its ligand, HLA-Bw4,  
407 among those with the receptor. Given that both HLA-C2 and Bw4 affected parasite prevalence in  
408 the same direction, we assessed the combined genotype of HLA-C2 and HLA-Bw4 (neither  
409 HLA-C2 nor HLA-Bw4, only HLA-C2, only HLA-Bw4, or both HLA-C2 and HLA-Bw4).  
410 Finally, we looked at the level of HLA-C expression (normalized as a z-score).

411

412 To estimate these effects, we used multi-level models with random effects at the individual- and  
413 household-levels. We used logistic regression for parasite prevalence and probability of  
414 symptoms if infected. We used Poisson models for malaria incidence. We used linear models for  
415 log parasite density, as well as temperature. All models were adjusted for site, household log  
416 entomological inoculation rate, and sex. Models included a continuous linear term for age, a  
417 binary indicator of age group (child vs. adult), and an interaction between the two to allow for  
418 effects to vary between age groups, because the study did not enroll participants between the  
419 ages of 11 and 17. Models for temperature also controlled for log parasite density at that visit.

420

421 In summary, the models followed this general form (an example model for parasite prevalence  
422 shown):

423

$$\begin{aligned} 424 \quad & \text{logit}(\text{Parasite prevalence}_{ijk}) = \text{KIR-HLA compound genotype}_{ij} + \text{Site}_i + \text{Log}(a\text{EIR}_i) + \text{Sex}_{ij} + \\ 425 \quad & \text{Age}_{ijk} + \text{Child}_{ij} + \text{Age} * \text{Child}_{ijk} + u_i + y_j \end{aligned}$$

426 where  $i$  indicates households,  $j$  indicates individuals, and  $k$  indicates specific visits. For example,  
427  $\text{age}_{ijk}$  denotes the age of child  $j$  from household  $i$  during visit  $k$ . As  $a\text{EIR}_i$  represents the average  
428 annual EIR recorded for household  $i$  (time-invariant), we assume relatively stable transmission  
429 intensity over the course of study follow-up.

430

431 We used Monte Carlo permutation tests to calculate exact p-values. We permuted exposure  
432 variables 10,000 times and calculated the two-sided p-value as the number of permutations that  
433 yielded coefficients greater than or equal to the absolute value of the observed coefficient  
434 divided by the number of models that converged (>99%) using the Stata `ritest` package version  
435 1.1.4 (Heß, 2017). For each outcome, we controlled for multiple testing separately using the false  
436 discovery rate (FDR) approach with the Stata `qqvalue` package (Newson, 2010). All analysis was  
437 done in Stata 15.1 (StataCorp, College Station, TX).

438

439 Finally, we performed the following sensitivity analyses for all models with the outcome of  
440 parasite prevalence: stratified by site, among children only, and among sickle cell wild type. We  
441 also estimated models using a measure of parasitemia defined as positive if a subject were  
442 positive either by microscopy or by LAMP among children for the entire follow-up period and  
443 among children and adults for the period LAMP data were available for both. Controlling for  
444 ethnicity (Bantu/non-Bantu) based on the language of their consent form did not improve model  
445 fit as compared to controlling for site because these two variables were collinear.

446

447 **Author Contributions**

448 JCD, PCC, IRB and MEF designed experimental questions. IRB and JCD created statistical  
449 analysis plan and JCD performed all statistical analyses. PCC, MEF and JCD prepared original  
450 manuscript. GD, MK, EA and JR generated the clinical data set. MM and MC performed KIR  
451 and HLA genotyping. GN and MV validated statistical analyses. All authors contributed to  
452 review and editing of manuscript.

453

454 **Acknowledgments**

455 We are grateful to all the parents and guardians for kindly giving their consent, and to the study  
456 participants for their cooperation. We thank all the members of the study team for their tireless  
457 effort and excellent work. We thank Noam Teyssier for generously sharing his computing  
458 expertise and time. Support for this work was provided by the National Institute of Allergy and  
459 Infectious Diseases (R01AI093615 and K24AI113002 to M.E.F., U19AI089674 to M.E.F., G.D.  
460 and M.K) and Henry Wheeler Center for Emerging and Neglected Diseases (to P.C.C.). In  
461 addition, this project has been funded in part with federal funds from the Frederick National  
462 Laboratory for Cancer Research, under Contract No. HHSN261200800001E. The content of this  
463 publication does not necessarily reflect the views or policies of the Department of Health and  
464 Human Services, nor does mention of trade names, commercial products, or organizations imply  
465 endorsement by the U.S. Government. This Research was supported in part by the Intramural  
466 Research Program of the NIH, Frederick National Lab, Center for Cancer Research.

467

468

469

470 **Tables and Figures**

471

472 **Table 1. Characteristics of study population**

|                                                                          | <b>Jinja</b>           | <b>Kanungu</b>         | <b>Tororo</b>          |
|--------------------------------------------------------------------------|------------------------|------------------------|------------------------|
| <b>Households (N)</b>                                                    | <b>97</b>              | <b>100</b>             | <b>95</b>              |
| Median household EIR (range)                                             | 2.1 (1.5-22.0)         | 6.3 (3.0-44.5)         | 67.6 (11.5-588.4)      |
| <b>Adults (N)</b>                                                        | <b>89</b>              | <b>78</b>              | <b>66</b>              |
| Median incidence of symptomatic malaria episodes per person year (range) | 0.0 (0.0-2.0)          | 0.2 (0.0-3.7)          | 0.0 (0.0-3.0)          |
| Parasite prevalence (% quarters parasite+)                               | 4.9%                   | 12.8%                  | 12.0%                  |
| <b>Children (N)</b>                                                      | <b>187</b>             | <b>267</b>             | <b>203</b>             |
| Median age at enrollment, years (range)                                  | 4.4 (0.5-10.0)         | 4.7 (0.5-9.9)          | 5.1 (0.6-10.0)         |
| Median incidence of symptomatic malaria episodes per person year (range) | 0.2 (0.0-5.1)          | 1.2 (0.0-8.1)          | 2.1 (0.0-8.8)          |
| Parasite prevalence (% quarters parasite +, range)                       | 12.8%                  | 36.4%                  | 64.2%                  |
| <b>Median follow up time, months (range)*</b>                            | <b>55.1 (2.3-58.6)</b> | <b>56.7 (0.0-58.3)</b> | <b>39.0 (1.8-40.3)</b> |
| <b>Sickle cell, n(%)</b>                                                 |                        |                        |                        |
| AA                                                                       | 201 (72.8%)            | 323 (93.6%)            | 195 (72.5%)            |
| AS                                                                       | 72 (26.1%)             | 22 (6.4%)              | 70 (26.0%)             |
| SS                                                                       | 0 (0.0%)               | 0 (0.0%)               | 2 (0.7%)               |
| No result                                                                | 3 (1.1%)               | 0 (0.0%)               | 2 (0.7%)               |
| <b>Bantu ethnicity, N (%)</b>                                            | <b>180 (65.5%)</b>     | <b>341 (98.8%)</b>     | <b>2 (0.7%)</b>        |

\*Note: 3 people in the sample had only one visit; Tororo visits after December 31, 2014 were excluded because transmission changed dramatically at this site after intensive indoor residual spraying campaigns were started.

473

474



475 **Table 2. KIR and Ligand Prevalence**

| <b>KIR and HLA prevalence</b>        | <b>N=890</b> |
|--------------------------------------|--------------|
| KIR                                  | %            |
| KIR2DL1†                             | 98.6         |
| KIR2DL2                              | 54.7         |
| KIR2DL3‡                             | 84.8         |
| KIR2DL4                              | 99.7         |
| KIR2DL5                              | 57.9         |
| KIR2DP1                              | 98.1         |
| KIR2DS1                              | 23.5         |
| KIR2DS2                              | 49.0         |
| KIR2DS3                              | 23.0         |
| KIR2DS4                              | 68.3         |
| KIR2DS5                              | 42.6         |
| KIR3DL1                              | 98.7         |
| KIR3DL2                              | 99.6         |
| KIR3DS1                              | 13.0         |
| HLA                                  | %            |
| C1/C2 ligand group zygosity*         |              |
| C1/C1                                | 19.5         |
| C1/C2                                | 53.1         |
| C2/C2                                | 27.4         |
| Bw4 ligand group (at least one copy) | 74.8         |

Note: Reduced Ns due to failed amplification or lack of DNA.

†N=888

‡N=883

\*N=889

476

477 **Table 3. Effect of HLA-C zygosity on parasite prevalence**

| C1/C2 zygosity | OR   | P-value | Empirical p-value | Empirical FDR q-value | N   |
|----------------|------|---------|-------------------|-----------------------|-----|
| C1/C1          | Ref  |         |                   |                       | 173 |
| C1/C2          | 1.26 | 0.045   | 0.036             | 0.111                 | 472 |
| C2/C2          | 1.54 | 0.001   | 0.001             | 0.008                 | 244 |

478

479 **Table 4. Effect of KIR2DL2/3 on parasite prevalence**

|                                        | OR   | P-value | Empirical p-value | Empirical FDR q-value | N   |
|----------------------------------------|------|---------|-------------------|-----------------------|-----|
| <b>2DL2/3</b>                          |      |         |                   |                       |     |
| no C1                                  | 1.24 | 0.061   | 0.045             | 0.115                 | 244 |
| C1 + 2DL2 only                         | 1.03 | 0.845   | 0.837             | 0.837                 | 87  |
| C1 + 2DL2/2DL3                         | 0.93 | 0.543   | 0.510             | 0.640                 | 273 |
| C1 + 2DL3 only                         | Ref  |         |                   |                       | 278 |
| <b>2DL2/3 among those without 2DS2</b> |      |         |                   |                       |     |
| no C1                                  | 1.19 | 0.199   | 0.171             | 0.354                 | 136 |
| C1 + 2DL2 only or 2DL2/2DL3            | 1.60 | 0.024   | 0.016             | 0.056                 | 45  |
| C1 + 2DL3 only                         | Ref  |         |                   |                       | 272 |

480

481

## 482 References

- 483 Andersson S, Fauriat C, Malmberg J-A, Ljunggren H-G, Malmberg K-J. 2009. KIR acquisition  
484 probabilities are independent of self-HLA class I ligands and increase with cellular KIR  
485 expression. *Blood* **114**:95–104. doi:10.1182/blood-2008-10-184549
- 486 Apps R, Meng Z, Prete GQD, Lifson JD, Zhou M, Carrington M. 2015. Relative Expression  
487 Levels of the HLA Class-I Proteins in Normal and HIV-Infected Cells. *The Journal of*  
488 *Immunology* **194**:3594–3600. doi:10.4049/jimmunol.1403234
- 489 Apps R, Qi Y, Carlson JM, Chen H, Gao X, Thomas R, Yuki Y, Del Prete GQ, Goulder P,  
490 Brumme ZL, Brumme CJ, John M, Mallal S, Nelson G, Bosch R, Heckerman D, Stein  
491 JL, Soderberg KA, Moody MA, Denny TN, Zeng X, Fang J, Moffett A, Lifson JD,  
492 Goedert JJ, Buchbinder S, Kirk GD, Fellay J, McLaren P, Deeks SG, Pereyra F, Walker  
493 B, Michael NL, Weintrob A, Wolinsky S, Liao W, Carrington M. 2013. Influence of  
494 HLA-C expression level on HIV control. *Science* **340**:87–91.  
495 doi:10.1126/science.1232685
- 496 Arora G, Hart GT, Manzella-Lapeira J, Doritchamou JY, Narum DL, Thomas LM, Brzostowski  
497 J, Rajagopalan S, Doumbo OK, Traore B, Miller LH, Pierce SK, Duffy PE, Crompton  
498 PD, Desai SA, Long EO. 2018. NK cells inhibit Plasmodium falciparum growth in red  
499 blood cells via antibody-dependent cellular cytotoxicity. *eLife Sciences* **7**:e36806.  
500 doi:10.7554/eLife.36806
- 501 Band G, Le QS, Clarke GM, Kivinen K, Hubbart C, Jeffreys AE, Rowlands K, Leffler EM,  
502 Jallow M, Conway DJ, Sisay-Joof F, Sirugo G, d’Alessandro U, Toure OB, Thera MA,  
503 Konate S, Sissoko S, Mangano VD, Bougouma EC, Sirima SB, Amenga-Etego LN,  
504 Ghansah AK, Hodgson AVO, Wilson MD, Enimil A, Ansong D, Evans J, Ademola SA,  
505 Apinjoh TO, Ndila CM, Manjurano A, Drakeley C, Reyburn H, Phu NH, Quyen NTN,  
506 Thai CQ, Hien TT, Teo YY, Manning L, Laman M, Michon P, Karunajeewa H, Siba P,  
507 Allen S, Allen A, Bahlo M, Davis TME, Simpson V, Shelton J, Spencer CCA, Busby  
508 GBJ, Kerasidou A, Drury E, Stalker J, Dilthey A, Mentzer AJ, McVean G, Bojang KA,  
509 Doumbo O, Modiano D, Koram KA, Agbenyega T, Amodu OK, Achidi E, Williams TN,  
510 Marsh K, Riley EM, Molyneux M, Taylor T, Dunstan SJ, Farrar J, Mueller I, Rockett  
511 KA, Kwiatkowski DP, Malaria Genomic Epidemiology Network. 2019. Insights into  
512 malaria susceptibility using genome-wide data on 17,000 individuals from Africa, Asia  
513 and Oceania. *Nature Communications* **10**:1–19. doi:10.1038/s41467-019-13480-z
- 514 Biassoni R, Falco M, Cambiaggi A, Costa P, Verdiani S, Pende D, Conte R, Di Donato C,  
515 Parham P, Moretta L. 1995. Amino acid substitutions can influence the natural killer  
516 (NK)-mediated recognition of HLA-C molecules. Role of serine-77 and lysine-80 in the  
517 target cell protection from lysis mediated by group 2 or group 1 NK clones. *J Exp Med*  
518 **182**:605–609. doi:10.1084/jem.182.2.605
- 519 Bona DD, Aiello A, Colomba C, Bilancia M, Accardi G, Rubino R, Giannitrapani L,  
520 Tuttolomondo A, Cascio A, Caiaffa MF, Rizzo S, Lorenzo GD, Candore G, Duro G,  
521 Macchia L, Montalto G, Caruso C. 2017. KIR2DL3 and the KIR ligand groups HLA-A-  
522 Bw4 and HLA-C2 predict the outcome of hepatitis B virus infection. *Journal of Viral*  
523 *Hepatitis* **24**:768–775. doi:10.1111/jvh.12698
- 524 Burrack KS, Hart GT, Hamilton SE. 2019. Contributions of natural killer cells to the immune  
525 response against Plasmodium. *Malaria Journal* **18**:321. doi:10.1186/s12936-019-2953-1

- 526 Carrington M, Wang S, Martin MP, Gao X, Schiffman M, Cheng J, Herrero R, Rodriguez AC,  
527 Kurman R, Mortel R, Schwartz P, Glass A, Hildesheim A. 2005. Hierarchy of resistance  
528 to cervical neoplasia mediated by combinations of killer immunoglobulin-like receptor  
529 and human leukocyte antigen loci. *The Journal of Experimental Medicine* **201**:1069–  
530 1075. doi:10.1084/jem.20042158
- 531 Corrah TW, Goonetilleke N, Kopycinski J, Deeks SG, Cohen MS, Borrow P, McMichael A,  
532 Brackenridge S. 2011. Reappraisal of the Relationship between the HIV-1-Protective  
533 Single-Nucleotide Polymorphism 35 Kilobases Upstream of the HLA-C Gene and  
534 Surface HLA-C Expression. *J Virol* **85**:3367–3374. doi:10.1128/JVI.02276-10
- 535 Crutcher JM, Hoffman SL. 1996. Malaria In: Baron S, editor. Medical Microbiology. Galveston  
536 (TX): University of Texas Medical Branch at Galveston.
- 537 Dantzer KW, Jagannathan P. 2018.  $\gamma\delta$  T Cells in Antimalarial Immunity: New Insights Into  
538 Their Diverse Functions in Protection and Tolerance. *Front Immunol* **9**.  
539 doi:10.3389/fimmu.2018.02445
- 540 Farrington LA, Jagannathan P, McIntyre TI, Vance HM, Bowen K, Boyle MJ, Nankya F,  
541 Wamala S, Auma A, Nalubega M, Sikyomu E, Naluwu K, Bigira V, Kapisi J, Dorsey G,  
542 Kanya MR, Feeney ME. 2016. Frequent Malaria Drives Progressive V $\delta$ 2 T-Cell Loss,  
543 Dysfunction, and CD16 Up-regulation During Early Childhood. *J Infect Dis* **213**:1483–  
544 1490. doi:10.1093/infdis/jiv600
- 545 Grau GE, Heremans H, Piguat PF, Pointaire P, Lambert PH, Billiau A, Vassalli P. 1989.  
546 Monoclonal antibody against interferon gamma can prevent experimental cerebral  
547 malaria and its associated overproduction of tumor necrosis factor. *PNAS* **86**:5572–5574.  
548 doi:10.1073/pnas.86.14.5572
- 549 Gumperz JE, Litwin V, Phillips JH, Lanier LL, Parham P. 1995. The Bw4 public epitope of  
550 HLA-B molecules confers reactivity with natural killer cell clones that express NKB1, a  
551 putative HLA receptor. *J Exp Med* **181**:1133–1144. doi:10.1084/jem.181.3.1133
- 552 Hafalla JCR, Cockburn IA, Zavala F. 2006. Protective and pathogenic roles of CD8+ T cells  
553 during malaria infection. *Parasite Immunology* **28**:15–24. doi:10.1111/j.1365-  
554 3024.2006.00777.x
- 555 Hansen DS, Bernard NJ, Nie CQ, Schofield L. 2007. NK Cells Stimulate Recruitment of  
556 CXCR3+ T Cells to the Brain during Plasmodium berghei-Mediated Cerebral Malaria.  
557 *The Journal of Immunology* **178**:5779–5788. doi:10.4049/jimmunol.178.9.5779
- 558 Hart GT, Theorell J, Tran T, Arora G, Crompton PD, Bryceson Y, Long EO. 2017. Antibody-  
559 dependent NK cell control of Plasmodium falciparum infection. *The Journal of*  
560 *Immunology* **198**:68.19-68.19.
- 561 Hart GT, Tran TM, Theorell J, Schlums H, Arora G, Rajagopalan S, Sangala ADJ, Welsh KJ,  
562 Traore B, Pierce SK, Crompton PD, Bryceson YT, Long EO. 2019. Adaptive NK cells in  
563 people exposed to Plasmodium falciparum correlate with protection from malaria.  
564 *Journal of Experimental Medicine* jem.20181681. doi:10.1084/jem.20181681
- 565 Heß S. 2017. Randomization Inference with Stata: A Guide and Software: *The Stata Journal*.  
566 doi:10.1177/1536867X1701700306
- 567 Hirayasu K, Ohashi J, Kashiwase K, Hananantachai H, Naka I, Ogawa A, Takanashi M, Satake  
568 M, Nakajima K, Parham P, Arase H, Tokunaga K, Patarapotikul J, Yabe T. 2012.  
569 Significant Association of KIR2DL3-HLA-C1 Combination with Cerebral Malaria and  
570 Implications for Co-evolution of KIR and HLA. *PLOS Pathogens* **8**:e1002565.  
571 doi:10.1371/journal.ppat.1002565

- 572 Jagannathan P, Kim CC, Greenhouse B, Nankya F, Bowen K, Eccles-James I, Muhindo MK,  
573 Arinaitwe E, Tappero JW, Kamya MR, Dorsey G, Feeney ME. 2014. Loss and  
574 dysfunction of V $\delta$ 2<sup>+</sup>  $\gamma\delta$  T cells are associated with clinical tolerance to malaria. *Sci*  
575 *Transl Med* **6**:251ra117. doi:10.1126/scitranslmed.3009793
- 576 Kamya MR, Arinaitwe E, Wanzira H, Katureebe A, Barusya C, Kigozi SP, Kilama M, Tatem  
577 AJ, Rosenthal PJ, Drakeley C, Lindsay SW, Staedke SG, Smith DL, Greenhouse B,  
578 Dorsey G. 2015. Malaria Transmission, Infection, and Disease at Three Sites with Varied  
579 Transmission Intensity in Uganda: Implications for Malaria Control. *Am J Trop Med Hyg*  
580 **92**:903–912. doi:10.4269/ajtmh.14-0312
- 581 Kariuki SN, Williams TN. 2020. Human genetics and malaria resistance. *Hum Genet* **139**:801–  
582 811. doi:10.1007/s00439-020-02142-6
- 583 Khakoo SI, Thio CL, Martin MP, Brooks CR, Gao X, Astemborski J, Cheng J, Goedert JJ,  
584 Vlahov D, Hilgartner M, Cox S, Little A-M, Alexander GJ, Cramp ME, O’Brien SJ,  
585 Rosenberg WMC, Thomas DL, Carrington M. 2004. HLA and NK Cell Inhibitory  
586 Receptor Genes in Resolving Hepatitis C Virus Infection. *Science* **305**:872–874.  
587 doi:10.1126/science.1097670
- 588 Kilama M, Smith DL, Hutchinson R, Kigozi R, Yeka A, Lavoy G, Kamya MR, Staedke SG,  
589 Donnelly MJ, Drakeley C, Greenhouse B, Dorsey G, Lindsay SW. 2014. Estimating the  
590 annual entomological inoculation rate for Plasmodium falciparum transmitted by  
591 Anopheles gambiae s.l. using three sampling methods in three sites in Uganda. *Malaria*  
592 *Journal* **13**:111. doi:10.1186/1475-2875-13-111
- 593 Kim S, Sunwoo JB, Yang L, Choi T, Song Y-J, French AR, Vlahiotis A, Piccirillo JF, Cella M,  
594 Colonna M, Mohanakumar T, Hsu KC, Dupont B, Yokoyama WM. 2008. HLA alleles  
595 determine differences in human natural killer cell responsiveness and potency. *Proc Natl*  
596 *Acad Sci U S A* **105**:3053–3058. doi:10.1073/pnas.0712229105
- 597 Kulkarni S, Martin MP, Carrington M. 2008. The Ying and Yang of HLA and KIR in Human  
598 Disease. *Semin Immunol* **20**:343–352. doi:10.1016/j.smim.2008.06.003
- 599 Kwiatkowski DP. 2005. How Malaria Has Affected the Human Genome and What Human  
600 Genetics Can Teach Us about Malaria. *The American Journal of Human Genetics*  
601 **77**:171–192. doi:10.1086/432519
- 602 Lefebvre MN, Harty JT. 2019. You Shall Not Pass: Memory CD8 T Cells in Liver-Stage  
603 Malaria. *Trends in Parasitology*. doi:10.1016/j.pt.2019.11.004
- 604 Lisovsky I, Kant S, Tremblay-McLean A, Isitman G, Kiani Z, Dupuy FP, Gilbert L, Bruneau J,  
605 Shoukry NH, Lebouché B, Bernard NF. 2019. Differential contribution of education  
606 through KIR2DL1, KIR2DL3, and KIR3DL1 to antibody-dependent (AD) NK cell  
607 activation and ADCC. *Journal of Leukocyte Biology* **105**:551–563.  
608 doi:10.1002/JLB.4A0617-242RRR
- 609 Lourebam SD, Sawian CE, Baruah S. 2011. Differential association of KIR gene loci to risk of  
610 malaria in ethnic groups of Assam, Northeast India. *Infection, Genetics and Evolution*  
611 **11**:1921–1928. doi:10.1016/j.meegid.2011.08.017
- 612 Mamedov MR, Scholzen A, Nair RV, Cumnock K, Kenkel JA, Oliveira JHM, Trujillo DL,  
613 Saligrama N, Zhang Y, Rubelt F, Schneider DS, Chien Y, Sauerwein RW, Davis MM.  
614 2018. A Macrophage Colony-Stimulating Factor-Producing  $\gamma\delta$  T Cell Subset Prevents  
615 Malarial Parasitemic Recurrence. *Immunity* **0**. doi:10.1016/j.immuni.2018.01.009
- 616 Marco MD, Schuster H, Backert L, Ghosh M, Rammensee H-G, Stevanović S. 2017. Unveiling  
617 the Peptide Motifs of HLA-C and HLA-G from Naturally Presented Peptides and

- 618            Generation of Binding Prediction Matrices. *The Journal of Immunology* **199**:2639–2651.  
619            doi:10.4049/jimmunol.1700938
- 620 Martin MP, Carrington M. 2008. KIR locus polymorphisms: genotyping and disease association  
621            analysis. *Methods Mol Biol* **415**:49–64. doi:10.1007/978-1-59745-570-1\_3
- 622 Middleton D, Gonzelez F. 2010. The extensive polymorphism of KIR genes. *Immunology* **129**:8–  
623            19. doi:10.1111/j.1365-2567.2009.03208.x
- 624 Moesta AK, Norman PJ, Yawata M, Yawata N, Gleimer M, Parham P. 2008. Synergistic  
625            Polymorphism at Two Positions Distal to the Ligand-Binding Site Makes KIR2DL2 a  
626            Stronger Receptor for HLA-C Than KIR2DL3. *The Journal of Immunology* **180**:3969–  
627            3979. doi:10.4049/jimmunol.180.6.3969
- 628 Moesta AK, Parham P. 2012. Diverse functionality among human NK cell receptors for the C1  
629            epitope of HLA-C: KIR2DS2, KIR2DL2, and KIR2DL3. *Front Immunol* **3**.  
630            doi:10.3389/fimmu.2012.00336
- 631 Moras M, Lefevre SD, Ostuni MA. 2017. From Erythroblasts to Mature Red Blood Cells:  
632            Organelle Clearance in Mammals. *Front Physiol* **8**. doi:10.3389/fphys.2017.01076
- 633 Mori M, Leitman E, Walker B, Ndung’u T, Carrington M, Goulder P. 2019. Impact of HLA  
634            Allele-KIR Pairs on HIV Clinical Outcome in South Africa. *J Infect Dis* **219**:1456–1463.  
635            doi:10.1093/infdis/jiy692
- 636 Mota MM, Pradel G, Vanderberg JP, Hafalla JCR, Frevert U, Nussenzweig RS, Nussenzweig V,  
637            Rodríguez A. 2001. Migration of Plasmodium Sporozoites Through Cells Before  
638            Infection. *Science* **291**:141–144. doi:10.1126/science.291.5501.141
- 639 Naiyer MM, Cassidy SA, Magri A, Cowton V, Chen K, Mansour S, Kranidioti H, Mbirbindi B,  
640            Rettman P, Harris S, Fanning LJ, Mulder A, Claas FHJ, Davidson AD, Patel AH,  
641            Purbhoo MA, Khakoo SI. 2017. KIR2DS2 recognizes conserved peptides derived from  
642            viral helicases in the context of HLA-C. *Science Immunology* **2**:eaal5296.  
643            doi:10.1126/sciimmunol.aal5296
- 644 Nakimuli A, Chazara O, Farrell L, Hiby SE, Tukwasibwe S, Knee O, Jayaraman J, Traherne JA,  
645            Elliott AM, Kaleebu P, Mirembe F, Moffett A. 2013. Killer cell immunoglobulin-like  
646            receptor (KIR) genes and their HLA-C ligands in a Ugandan population. *Immunogenetics*  
647            **65**:765–775. doi:10.1007/s00251-013-0724-7
- 648 Newson RB. 2010. Frequentist Q-values for Multiple-test Procedures. *The Stata Journal* **10**:568–  
649            584. doi:10.1177/1536867X1101000403
- 650 Parsons MS, Zipperlen K, Gallant M, Grant M. 2010. Killer cell immunoglobulin-like receptor  
651            3DL1 licenses CD16-mediated effector functions of natural killer cells. *Journal of*  
652            *Leukocyte Biology* **88**:905–912. doi:10.1189/jlb.1009687
- 653 Rodriguez-Barraquer I, Arinaitwe E, Jagannathan P, Kanya MR, Rosenthal PJ, Rek J, Dorsey G,  
654            Nankabirwa J, Staedke SG, Kilama M, Drakeley C, Ssewanyana I, Smith DL,  
655            Greenhouse B. 2018. Quantification of anti-parasite and anti-disease immunity to malaria  
656            as a function of age and exposure. *eLife*. doi:10.7554/eLife.35832
- 657 Sturm A, Amino R, Sand C van de, Regen T, Retzlaff S, Rennenberg A, Krueger A, Pollok J-M,  
658            Menard R, Heussler VT. 2006. Manipulation of Host Hepatocytes by the Malaria Parasite  
659            for Delivery into Liver Sinusoids. *Science* **313**:1287–1290. doi:10.1126/science.1129720
- 660 Thomas R, Apps R, Qi Y, Gao X, Male V, O’hUigin C, O’Connor G, Ge D, Fellay J, Martin JN,  
661            Margolick J, Goedert JJ, Buchbinder S, Kirk GD, Martin MP, Telenti A, Deeks SG,  
662            Walker BD, Goldstein D, McVicar DW, Moffett A, Carrington M. 2009. HLA-C cell

- 663 surface expression and control of HIV/AIDS correlate with a variant upstream of HLA-C.  
664 *Nat Genet* **41**:1290–1294. doi:10.1038/ng.486
- 665 Tran TM, Li S, Doumbo S, Doumtabe D, Huang C-Y, Dia S, Bathily A, Sangala J, Kone Y,  
666 Traore A, Niangaly M, Dara C, Kayentao K, Ongoiba A, Doumbo OK, Traore B,  
667 Crompton PD. 2013. An intensive longitudinal cohort study of Malian children and adults  
668 reveals no evidence of acquired immunity to Plasmodium falciparum infection. *Clin*  
669 *Infect Dis* **57**:40–47. doi:10.1093/cid/cit174
- 670 Winter CC, Gumperz JE, Parham P, Long EO, Wagtmann N. 1998. Direct Binding and  
671 Functional Transfer of NK Cell Inhibitory Receptors Reveal Novel Patterns of HLA-C  
672 Allotype Recognition. *The Journal of Immunology* **161**:571–577.
- 673 World Health Organization. 2018. World Malaria Report 2017. Geneva, Switzerland: World  
674 Health Organization.
- 675 Zaidi I, Diallo H, Conteh S, Robbins Y, Kolasny J, Orr-Gonzalez S, Carter D, Butler B, Lambert  
676 L, Brickley E, Morrison R, Sissoko M, Healy SA, Sim BKL, Doumbo OK, Hoffman SL,  
677 Duffy PE. 2017.  $\gamma\delta$  T Cells Are Required for the Induction of Sterile Immunity during  
678 Irradiated Sporozoite Vaccinations. *The Journal of Immunology* ji1700314.  
679 doi:10.4049/jimmunol.1700314  
680
